# Supplementary material
Source: PubMed Central journal article supplement (PMC3674112)
Supplement: NIHMS427332-supplement-07.pdf [file NIHMS427332-supplement-07.pdf]

**Figure 6. Fixation quality and sensitivity estimated by microperimetry in NP15**

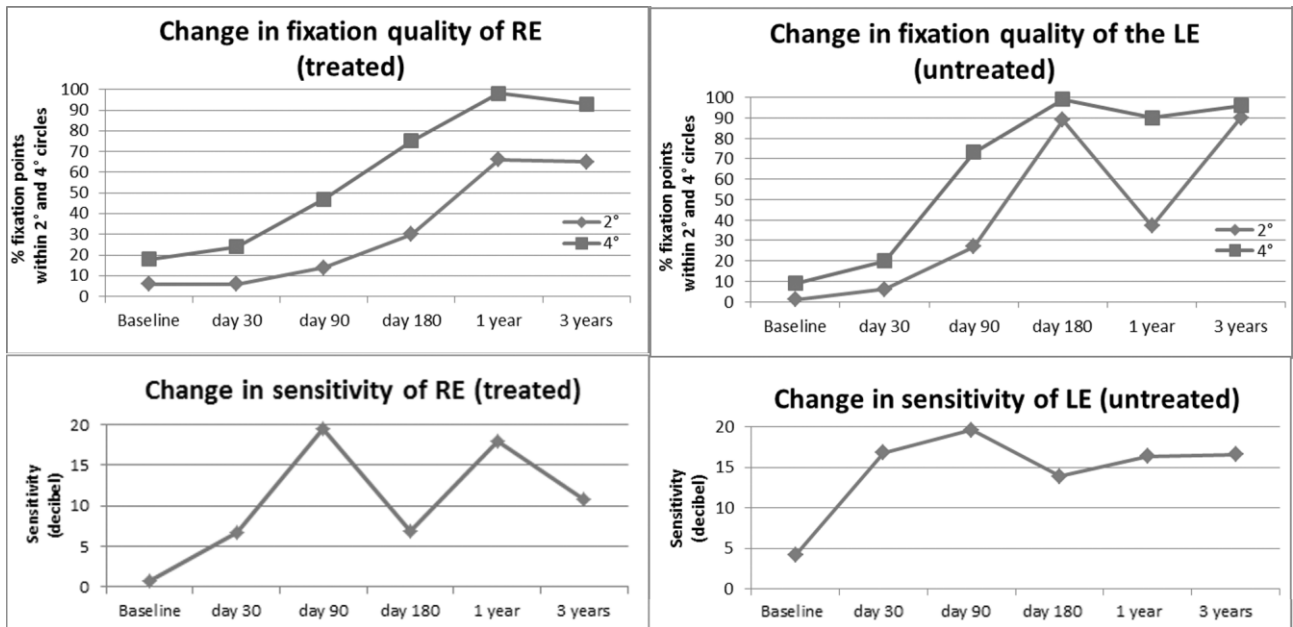

*The graphs illustrate improvements of both macular sensitivity and fixation stability compared to baseline.*

*RE: Right Eye*

*LE: Left Eye*
