# Supplementary material
Source: PubMed Central journal article supplement (PMC3674112)
Supplement: NIHMS427332-supplement-08.pdf [file NIHMS427332-supplement-08.pdf]

Figure 7. Microperimetry sensitivity map in NP15 at selected timepoints.

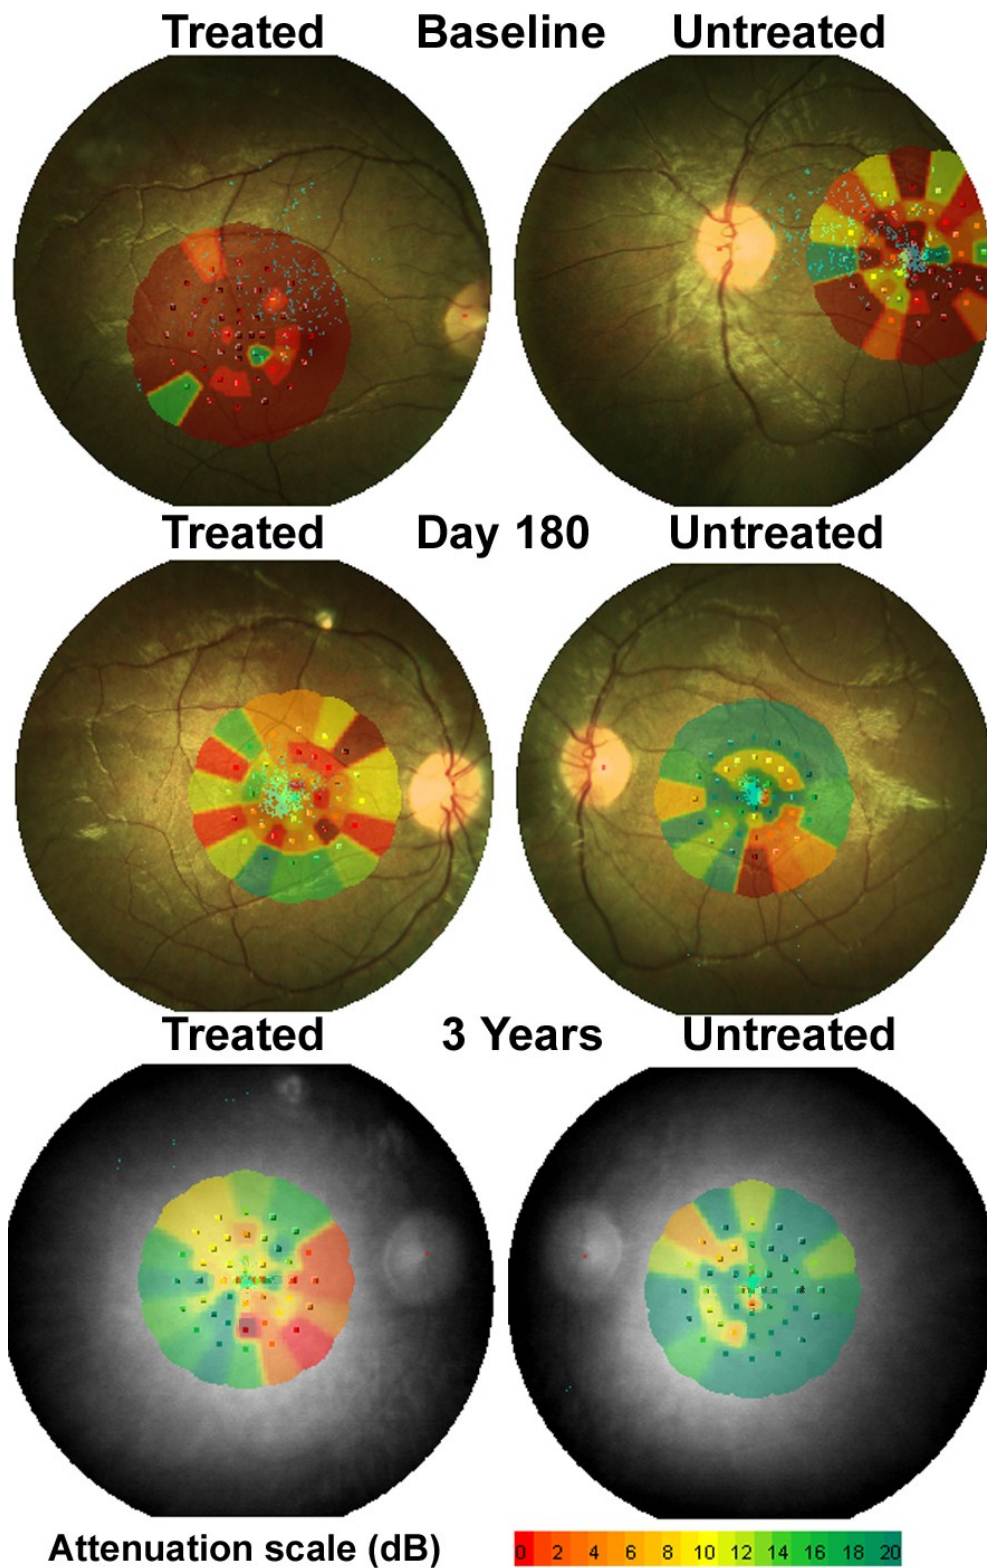

*The images show the sensitivity by coloured intensity map and fixation points as light blue dots.*

*The longitudinal data analysis of microperimetry in NP15 shows a change of fixation from an unstable extrafoveal site to a stable foveal site.*
